# Supplementary material for: Induction maintenance with tumour necrosis factor-inhibitor combination therapy with discontinuation versus methotrexate monotherapy in early rheumatoid arthritis: a systematic review and meta-analysis of efficacy in randomised controlled trials
Source: PubMed Central journal article supplement — RMD Open. 2016 Sep 6;2(2):e000323. doi: 10.1136/rmdopen-2016-000323 (PMC5013458; doi:10.1136/rmdopen-2016-000323), 2016-09-06
Supplement: rmdopen-2016-000323supp_tables.pdf [file rmdopen-2016-000323supp_tables.pdf]

|                                                                         |                                                                                                                                                                                                                                                                                                                                                                                                                                                                       |
|-------------------------------------------------------------------------|-----------------------------------------------------------------------------------------------------------------------------------------------------------------------------------------------------------------------------------------------------------------------------------------------------------------------------------------------------------------------------------------------------------------------------------------------------------------------|
| EMBASE                                                                  | 'Rheumatoid arthritis' AND ('Methotrexate' OR 'antirheumatic agent') AND ('randomized controlled trial(topic)' OR 'controlled clinical trial ' AND ('tumor necrosis factor alpha' OR 'biological product' OR 'adalimumab' OR "Infliximab" OR "Golimumab" OR "Certolizumab Pegol" OR "Etanercept") AND ('treatment outcome' OR 'disease activity')                                                                                                                     |
| PUBMED<br>(species:humans)<br>(Article type:clinical trial)             | ("Rheumatoid arthritis"[Mesh] OR "Rheumatoid arthritis"[tiab]) AND (Methotrexate[Mesh] OR MTX OR Methotrexate[tiab]) AND ((Adalimumab[Supplementary Concept] OR ADA OR Adalimumab) OR (Golimumab [Supplementary Concept]) OR ("Certolizumab pegol" [Supplementary Concept] OR Certolizumab) OR (Etanercept) OR (Infliximab [Supplementary Concept] OR IFX) OR ("tumor necrosis factor alpha" OR "monoclonal antibody" OR "biologic agent"[mesh] OR "biologic agent")) |
| COCHRANE<br>CENTRAL<br>REGISTER OF<br>CONTROLLED<br>TRIALS              | ("Rheumatoid arthritis") AND (Methotrexate OR MTX) AND (Adalimumab OR ADA OR "tumor necrosis factor alpha" OR "biologic agent" OR Golimumab OR "certolizumab pegol" OR Certolizumab OR Etanercept OR Infliximab OR IFX)                                                                                                                                                                                                                                               |
| Clinicaltrials.gov<br>(limited by<br>completed studies<br>with results) | <i>"Early Rheumatoid Arthritis"</i>                                                                                                                                                                                                                                                                                                                                                                                                                                   |

**Supplementary Table 1.** Search terms used in the databases.

| <b>Study, year of publication</b> | <b>Randomized</b> | <b>Reported appropriate randomization procedure</b> | <b>Double-blinded</b> | <b>Reported appropriate double-blinding method</b> | <b>Reasons for withdrawals and drop outs described</b> | <b>Score</b> |
|-----------------------------------|-------------------|-----------------------------------------------------|-----------------------|----------------------------------------------------|--------------------------------------------------------|--------------|
| <i>T20,2004</i>                   | 1                 | 1                                                   | 1                     | 1                                                  | 1                                                      | 5            |
| <i>BeST,2005</i>                  | 1                 | 1                                                   | 0                     | 0                                                  | 1                                                      | 3            |
| <i>GUEPARD,2009</i>               | 1                 | 1                                                   | 0                     | 0                                                  | 1                                                      | 3            |
| <i>HIT HARD,2012</i>              | 1                 | 1                                                   | 1                     | 1                                                  | 1                                                      | 5            |
| <i>OPERA,2014</i>                 | 1                 | 1                                                   | 1                     | 1                                                  | 1                                                      | 5            |
| <i>OPTIMA,2014</i>                | 1                 | 1                                                   | 1                     | 1                                                  | 1                                                      | 5            |

**Supplementary Table 2.** Summary of the quality evaluation by Jadad scale.

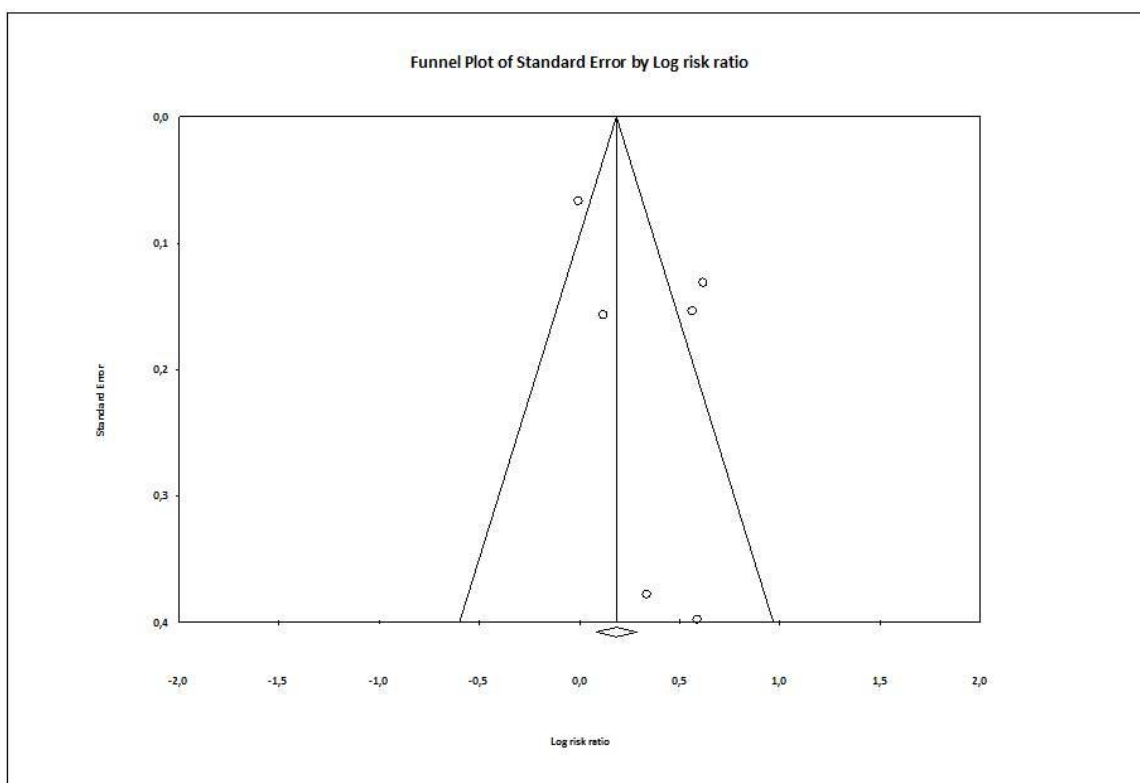

**Supplementary Table 3.** Funnel plot for studies included in the meta-analysis.
